# Supplementary material for: Obesity Is Mediated by Differential Aryl Hydrocarbon Receptor Signaling in Mice Fed a Western Diet
Source: PubMed Central journal article supplement (PMC3440132; doi:10.1289/ehp.1205003), 2012-05-18
Supplement: ehp.1205003.s001.pdf [file ehp.1205003.s001.pdf]

## Supporting Materials

**Title:** Obesity Is Mediated by Differential Aryl Hydrocarbon Receptor Signaling in Mice Fed A Western Diet

**Authors:** Joanna S. Kerley-Hamilton, Heidi W. Trask, Christian J. A. Ridley, Eric DuFour, Carol S. Ringelberg, Nilufer Nurinova, Diandra Wong, Karen L. Moodie, Samantha L. Shipman, Jason H. Moore, Murray Korc, Nicholas W. Shworak, Craig R. Tomlinson

| <b>Table of Contents</b>                                          | <b>Page</b> |
|-------------------------------------------------------------------|-------------|
| Title and Authors                                                 | 1           |
| Table S1. PCR Primers                                             | 2           |
| Table S2. QPCR Results                                            | 3           |
| Table S3. B6 vs. B6.D2 Body Mass                                  | 4           |
| Table S4. B6 vs. B6.D2 Body Mass Percentages                      | 5           |
| Table S5. B6 vs. B6.D2 Differentially Expressed Liver mRNA Levels | 6           |
| Table S6. Complete B6 vs. B6.D2 Liver miRNA Gene List             | 7           |
| Table S7. Obesity-Related miRNA Gene List. References             | 12          |

| Table S1. Primer Specifications |                                                                                              |                           |
|---------------------------------|----------------------------------------------------------------------------------------------|---------------------------|
| Gene                            | Primers                                                                                      | Amplicon Base Pair Length |
| <i>Cyp2d26</i>                  | Forward 5'-GCC GTG TCC ACC AGG AAA TCG-3'<br>Reverse 5'-GAT GAA GAA GTC TTG GAA TTT AAT G-3' | 182                       |
| <i>Sqle</i>                     | Forward 5'-CTT GCA TCA GCT CCG AAA AGC-3'<br>Reverse 5'-GCA ACC CAA CAG GAC CGG TCA C-3'     | 77                        |
| <i>Ppar <math>\alpha</math></i> | Forward 5'-GGCTTCTTTCGGCGAACTATT-3'<br>Reverse 5'-CCGATCACACTTGTTCGTACAC-3'                  | 54                        |
| <i>Mt1</i>                      | Forward 5'-AAGAGTGAGTTGGGACACCTT-3'<br>Reverse 5'-CCGATCACACTTGTTCGTACAC -3'                 | 111                       |
| <i>Lcn2</i>                     | Forward 5'-GGGAAATATGCACAGGTATCCTC-3'<br>Reverse 5'-GCCACTTGCACATTGTAGCTC-3'                 | 51                        |
| <i>Hsd3b5</i>                   | Forward 5'-AGTGCTAAATAGCGTGTTTACCA-3'<br>Reverse 5'-ACTTTTTGTGTAGTGTCTCCCTG-3                | 152                       |

| Table S2. The QPCR Results Confirm the Microarray Results ( $p$ -value $\leq 0.05$ ). |                                           |      |              |      |                 |        |            |        |
|---------------------------------------------------------------------------------------|-------------------------------------------|------|--------------|------|-----------------|--------|------------|--------|
| Gene                                                                                  | Gene Fold Change for Microarrays vs. QPCR |      |              |      |                 |        |            |        |
|                                                                                       | B6W / B6.D2W                              |      | B6R / B6.D2R |      | B6.D2W / B6.D2R |        | B6W / B6R  |        |
|                                                                                       | Microarray                                | QPCR | Microarray   | QPCR | Microarray      | QPCR   | Microarray | QPCR   |
| <i>Cyp2d26</i>                                                                        | 42.02                                     | 5293 |              |      |                 |        |            |        |
| <i>Hsd3b5</i>                                                                         |                                           |      |              |      | 0.03            | 0.0034 | 0.03       | 0.0003 |
| <i>Lcn2</i>                                                                           |                                           |      |              |      | 32.26           | 36.00  | 15.63      | 22.16  |
| <i>Mt1</i>                                                                            |                                           |      | 0.25         | 0.14 |                 |        |            |        |
| <i>Ppara</i>                                                                          | 0.66                                      | 0.33 |              |      |                 |        |            |        |
| <i>Sqle</i>                                                                           |                                           |      |              |      | 0.14            | 0.0007 | 0.21       | 0.08   |

B6 = high-affinity AHR mouse strain.

B6.D2 = low-affinity AHR mouse strain.

W = Western diet; R = Regular diet

n = 4 mice per experimental group.

**Table S3.** Body Mass and Standard Error of the Mean (SEM) of B6 and B6.D2 Mice Fed Regular Chow or Western Chow for 27 Weeks Beginning at 5 Weeks of Age.

| Weeks On Diet | B6 Regular Diet |      | B6.D2 Regular Diet |      | B6 Western Diet |      | B6.D2 Western Diet |      |
|---------------|-----------------|------|--------------------|------|-----------------|------|--------------------|------|
|               | Ave. Mass       | SEM  | Ave. Mass          | SEM  | Ave. Mass       | SEM  | Ave. Mass          | SEM  |
| 0             | 19.25           | 0.25 | 20.50              | 0.71 | 20.38           | 0.26 | 20.00              | 0.50 |
| 1             | 21.75           | 0.25 | 22.63              | 0.60 | 23.75           | 0.16 | 23.13              | 0.35 |
| 2             | 24.00           | 0.38 | 24.38              | 0.46 | 25.13           | 0.23 | 24.38              | 0.53 |
| 3             | 25.25           | 0.25 | 25.38              | 0.42 | 26.88           | 0.30 | 25.63              | 0.80 |
| 4             | 26.13           | 0.23 | 26.25              | 0.49 | 28.00           | 0.42 | 26.25              | 1.28 |
| 5             | 27.00           | 0.27 | 27.25              | 0.45 | 30.88           | 0.40 | 28.75              | 0.94 |
| 6             | 27.75           | 0.31 | 27.88              | 0.48 | 32.50           | 0.42 | 30.13              | 1.03 |
| 7             | 28.25           | 0.37 | 28.38              | 0.56 | 34.00           | 0.53 | 32.13              | 1.16 |
| 8             | 28.75           | 0.49 | 29.00              | 0.60 | 35.50           | 0.46 | 33.00              | 1.10 |
| 9             | 29.38           | 0.50 | 29.75              | 0.62 | 37.50           | 0.46 | 34.00              | 1.30 |
| 10            | 29.88           | 0.35 | 30.38              | 0.60 | 38.00           | 0.57 | 35.25              | 1.28 |
| 11            | 30.38           | 0.38 | 30.63              | 0.68 | 38.75           | 0.70 | 36.50              | 1.36 |
| 12            | 30.38           | 0.38 | 31.25              | 0.73 | 40.00           | 0.71 | 37.50              | 1.39 |
| 13            | 30.88           | 0.40 | 32.00              | 0.53 | 40.88           | 0.85 | 37.63              | 1.43 |
| 14            | 31.75           | 0.25 | 32.00              | 0.50 | 41.63           | 0.80 | 38.25              | 1.44 |
| 15            | 32.00           | 0.46 | 32.63              | 0.53 | 42.75           | 0.73 | 40.13              | 1.68 |
| 16            | 32.13           | 0.44 | 33.25              | 0.65 | 44.00           | 0.68 | 40.25              | 1.71 |
| 17            | 32.63           | 0.46 | 33.63              | 0.86 | 45.88           | 0.69 | 41.13              | 1.66 |
| 18            | 33.00           | 0.53 | 34.13              | 0.72 | 46.00           | 0.63 | 41.50              | 1.63 |
| 19            | 33.63           | 0.46 | 34.13              | 0.67 | 47.00           | 0.60 | 41.50              | 1.63 |
| 20            | 32.50           | 0.57 | 34.88              | 0.69 | 46.13           | 0.90 | 43.00              | 1.65 |
| 21            | 32.88           | 0.35 | 34.75              | 0.65 | 46.88           | 0.85 | 41.88              | 1.30 |
| 22            | 34.00           | 0.33 | 34.88              | 0.83 | 49.00           | 0.63 | 42.25              | 1.35 |
| 23            | 35.00           | 0.57 | 35.88              | 0.64 | 49.75           | 0.62 | 43.75              | 1.42 |
| 24            | 35.00           | 0.42 | 36.38              | 0.82 | 49.00           | 0.60 | 44.75              | 1.39 |
| 25            | 35.75           | 0.56 | 36.88              | 0.79 | 51.25           | 0.53 | 44.50              | 1.64 |
| 26            | 36.38           | 0.78 | 37.25              | 0.67 | 51.63           | 0.46 | 44.50              | 1.77 |
| 27            | 36.38           | 0.73 | 37.50              | 0.76 | 51.38           | 0.50 | 44.88              | 1.88 |

Ave. = Average.

B6 = high-affinity AHR mouse strain.

B6.D2 = low-affinity AHR mouse strain.

All mice were male.

n = 8 mice per experimental group.

**Table S4. B6 Mice Become Significantly More Obese than B6.D2 Mice When Fed a High-Fat Diet.**

| Weeks On Diet | % Body Mass B6 / B6.D2 |         |              |         |
|---------------|------------------------|---------|--------------|---------|
|               | Regular Diet           | p-value | Western Diet | p-value |
| 0             | 93.9                   | 0.11779 | 101.9        | 0.51763 |
| 1             | 96.1                   | 0.19709 | 102.7        | 0.12837 |
| 2             | 98.5                   | 0.53918 | 103.1        | 0.21588 |
| 3             | 99.5                   | 0.80184 | 104.9        | 0.16492 |
| 4             | 99.5                   | 0.82053 | 106.7        | 0.21464 |
| 5             | 99.1                   | 0.64198 | 107.4        | 0.05624 |
| 6             | 99.6                   | 0.83041 | 107.9        | 0.05030 |
| 7             | 99.6                   | 0.85535 | 105.8        | 0.16317 |
| 8             | 99.1                   | 0.75130 | 107.6        | 0.05518 |
| 9             | 98.7                   | 0.64432 | 110.3        | 0.02339 |
| 10            | 98.4                   | 0.48132 | 107.8        | 0.06937 |
| 11            | 99.2                   | 0.75219 | 106.2        | 0.16413 |
| 12            | 97.2                   | 0.30226 | 106.7        | 0.13098 |
| 13            | 96.5                   | 0.11356 | 108.6        | 0.07084 |
| 14            | 99.2                   | 0.66156 | 108.8        | 0.05928 |
| 15            | 98.1                   | 0.39065 | 106.5        | 0.17431 |
| 16            | 96.6                   | 0.17300 | 109.3        | 0.06085 |
| 17            | 97.0                   | 0.32470 | 111.6        | 0.01953 |
| 18            | 96.7                   | 0.22941 | 110.8        | 0.02169 |
| 19            | 98.5                   | 0.54700 | 113.3        | 0.00674 |
| 20            | 93.2                   | 0.01891 | 107.3        | 0.11779 |
| 21            | 94.6                   | 0.02330 | 111.9        | 0.00628 |
| 22            | 97.5                   | 0.34493 | 116.0        | 0.00046 |
| 23            | 97.6                   | 0.32313 | 113.7        | 0.00172 |
| 24            | 96.2                   | 0.15916 | 109.5        | 0.01372 |
| 25            | 96.9                   | 0.26416 | 115.2        | 0.00152 |
| 26            | 97.7                   | 0.40975 | 116.0        | 0.00163 |
| 27            | 97.0                   | 0.30261 | 114.5        | 0.00476 |

Values in gray are significantly different at  $\leq 0.05$ .

B6 = high-affinity AHR mouse strain.

B6.D2 = low-affinity AHR mouse strain.

All mice were male and began the diet regimen at 5 weeks of age. n = 8 mice per experimental group.

**Supplemental Material Table S5**

Differentially Expressed mRNA Levels of All Genes of All Experimental Conditions (p-value  $\leq 0.05$ )

This table is provided as a separate Excel file.

**Table S6.** Differentially Expressed Mouse miRNA Genes of All Experimental Conditions ( $p$ -value  $\leq 0.05$ ).

| Transcript Name | Transcript Type | Fold Change |           |         |             |
|-----------------|-----------------|-------------|-----------|---------|-------------|
|                 |                 | B6R/B6D2R   | B6W/B6D2W | B6W/B6R | B6D2W/B6D2R |
| miR-205         | miRNA           |             |           | 4.55    | 5.26        |
| miR-1224        | miRNA           |             |           | 2.94    | 4.17        |
| miR-1274a       | miRNA           |             |           |         | 4.17        |
| miR-1949        | miRNA           |             |           |         | 3.85        |
| miR-200a        | miRNA           |             |           |         | 3.57        |
| miR-429         | miRNA           |             |           | 3.23    | 3.45        |
| miR-1937b       | miRNA           | 2.49        |           |         | 3.33        |
| miR-200b        | miRNA           |             |           | 3.70    | 3.03        |
| miR-155         | miRNA           |             |           | 4.00    | 2.94        |
| miR-212         | miRNA           | 0.52        |           | 5.00    | 2.78        |
| miR-200b-star   | miRNA           |             |           | 2.38    | 2.78        |
| miR-132         | miRNA           | 0.72        |           | 4.17    | 2.56        |
| miR-34a         | miRNA           |             |           | 3.23    | 2.44        |
| miR-486         | miRNA           |             |           |         | 2.44        |
| v11_miR-685     | miRNA           |             |           |         | 2.44        |
| miR-342-5p      | miRNA           |             |           | 3.57    | 2.38        |
| miR-214         | miRNA           |             |           |         | 2.38        |
| miR-342-3p      | miRNA           |             |           | 3.03    | 2.27        |
| miR-181d        | miRNA           |             |           |         | 2.27        |
| miR-149         | miRNA           |             |           | 2.04    | 2.13        |
| miR-181c        | miRNA           |             |           | 1.56    | 2.13        |
| miR-497         | miRNA           |             |           | 1.59    | 1.92        |
| miR-130b        | miRNA           |             |           | 2.50    | 1.89        |
| miR-2133        | miRNA           |             | 0.48      |         | 1.89        |
| miR-676         | miRNA           |             |           | 1.54    | 1.85        |
| miR-690         | miRNA           | 2.08        |           |         | 1.85        |
| miR-125b-3p     | miRNA           |             |           |         | 1.85        |
| miR-206         | miRNA           |             |           | 1.92    | 1.79        |
| miR-106b-star   | miRNA           |             |           |         | 1.69        |
| miR-181b        | miRNA           |             |           | 2.04    | 1.67        |
| miR-181a2       | stem-loop       |             | 0.78      |         | 1.64        |
| miR-200a-star   | miRNA           |             |           |         | 1.64        |
| miR-291b-5p     | miRNA           |             |           |         | 1.64        |
| miR-542-5p      | miRNA           | 0.57        |           | 2.22    | 1.59        |
| miR-3470b       | miRNA           |             |           |         | 1.54        |
| miR-322         | miRNA           |             |           | 1.79    | 1.47        |
| miR-296-3p      | miRNA           |             |           |         | 1.47        |
| miR-92a-star    | miRNA           |             |           |         | 1.47        |
| miR-6922        | stem-loop       |             |           |         | 1.45        |
| miR-181d        | stem-loop       |             |           |         | 1.41        |
| miR-682         | stem-loop       |             |           |         | 1.41        |
| miR-223         | miRNA           |             |           | 2.50    | 1.39        |
| miR-149         | stem-loop       |             |           | 1.25    | 1.39        |
| miR-130b        | stem-loop       | 1.19        |           |         | 1.32        |

| Table 6 (continued) |                 | Fold Change |           |         |             |
|---------------------|-----------------|-------------|-----------|---------|-------------|
| Transcript Name     | Transcript Type | Fold Change |           |         |             |
|                     |                 | B6R/B6D2R   | B6W/B6D2W | B6W/B6R | B6D2W/B6D2R |
| miR-6921            | stem-loop       |             |           |         | 1.32        |
| miR-6922            | stem-loop       |             |           |         | 1.32        |
| miR-21451           | stem-loop       | 1.45        |           |         | 1.30        |
| miR-125b1           | stem-loop       |             |           |         | 1.30        |
| miR-191             | miRNA           |             |           |         | 1.30        |
| miR-214             | stem-loop       |             |           |         | 1.28        |
| miR-3470a           | miRNA           |             |           |         | 1.28        |
| miR-181a2           | stem-loop       |             | 0.79      |         | 1.27        |
| miR-136             | miRNA           |             |           |         | 1.27        |
| miR-883b-5p         | miRNA           |             |           |         | 1.27        |
| miR-298             | stem-loop       |             | 0.80      |         | 1.25        |
| miR-1195            | stem-loop       |             |           |         | 1.23        |
| miR-342             | stem-loop       |             |           | 1.52    | 1.22        |
| miR-133a            | miRNA           |             |           |         | 1.19        |
| miR-1191            | stem-loop       |             |           |         | 1.14        |
| miR-28              | stem-loop       | 0.79        |           |         | 0.87        |
| miR-327             | stem-loop       |             |           |         | 0.86        |
| miR-1948            | stem-loop       |             |           |         | 0.85        |
| miR-377             | miRNA           | 0.81        |           | 1.15    | 0.84        |
| miR-21-star         | miRNA           |             |           |         | 0.83        |
| miR-20a             | stem-loop       |             | 1.16      |         | 0.82        |
| miR-30b-star        | miRNA           |             |           |         | 0.82        |
| miR-30c2            | stem-loop       |             |           |         | 0.81        |
| miR-713             | miRNA           |             |           |         | 0.80        |
| miR-665             | stem-loop       | 0.81        |           |         | 0.79        |
| miR-30c2            | stem-loop       |             |           |         | 0.79        |
| miR-741             | miRNA           |             |           |         | 0.79        |
| miR-669f            | miRNA           |             |           |         | 0.78        |
| miR-291a-5p         | miRNA           |             |           |         | 0.78        |
| miR-28-star         | miRNA           |             |           |         | 0.77        |
| miR-2182            | miRNA           |             |           |         | 0.75        |
| miR-194             | miRNA           |             |           |         | 0.74        |
| miR-139--5p         | miRNA           |             |           | 0.71    | 0.71        |
| miR-30a-star        | miRNA           |             |           | 0.64    | 0.71        |
| miR-20a             | miRNA           | 1.28        | 1.38      | 0.77    | 0.71        |
| miR-331-3p          | miRNA           | 0.58        |           |         | 0.71        |
| miR-193             | stem-loop       |             |           |         | 0.69        |
| miR-345-3p          | miRNA           |             |           | 0.51    | 0.68        |
| miR-187             | miRNA           |             |           |         | 0.66        |
| miR-30a             | miRNA           |             | 1.36      | 0.72    | 0.64        |
| miR-15a             | miRNA           |             |           |         | 0.64        |
| miR-30c2-star       | miRNA           |             |           |         | 0.60        |
| let7g-star          | miRNA           |             |           |         | 0.57        |
| miR-92a             | miRNA           | 0.82        |           | 0.60    | 0.57        |
| miR-101a            | miRNA           |             |           |         | 0.56        |
| miR-101b            | miRNA           |             | 1.39      |         | 0.56        |
| miR-184             | miRNA           |             |           |         | 0.56        |
| miR-467d-star       | miRNA           |             |           |         | 0.56        |
| miR-29c             | miRNA           |             | 1.40      |         | 0.55        |



| Table 6 (continued) |                 | Fold Change |           |         |             |
|---------------------|-----------------|-------------|-----------|---------|-------------|
| Transcript Name     | Transcript Type | Fold Change |           |         |             |
|                     |                 | B6R/B6D2R   | B6W/B6D2W | B6W/B6R | B6D2W/B6D2R |
| miR-7a              | miRNA           |             |           |         | 0.55        |
| miR-22-star         | miRNA           |             |           |         | 0.55        |
| miR-26b             | miRNA           |             |           |         | 0.55        |
| miR-770-5p          | miRNA           |             |           |         | 0.55        |
| miR-345-5p          | miRNA           |             |           |         | 0.53        |
| miR-592             | miRNA           |             | 1.24      |         | 0.52        |
| miR-148a            | miRNA           |             |           |         | 0.48        |
| miR-193             | miRNA           |             |           |         | 0.48        |
| miR-127             | miRNA           |             |           |         | 0.44        |
| miR-1948            | miRNA           | 0.68        | 0.78      | 0.31    | 0.27        |
| miR-146b            | miRNA           |             |           | 3.85    |             |
| miR-214-star        | miRNA           |             |           | 2.50    |             |
| miR-199b-star       | miRNA           |             |           | 2.17    |             |
| miR-301a            | miRNA           |             |           | 2.00    |             |
| miR-27a-star        | miRNA           |             |           | 1.96    |             |
| miR-34c             | miRNA           |             |           | 1.92    |             |
| let7e               | miRNA           | 0.58        |           | 1.72    |             |
| miR-199a-5p         | miRNA           |             |           | 1.61    |             |
| miR-466j            | miRNA           |             |           | 1.45    |             |
| miR-484             | miRNA           |             |           | 1.45    |             |
| miR-200b            | stem-loop       |             |           | 1.43    |             |
| miR-1188            | miRNA           |             |           | 1.39    |             |
| miR-27b-star        | miRNA           |             |           | 1.39    |             |
| miR-3474            | miRNA           |             |           | 1.39    |             |
| miR-350             | stem-loop       |             |           | 1.39    |             |
| let7i-star          | miRNA           |             |           | 1.37    |             |
| miR-23a             | stem-loop       |             | 1.17      | 1.35    |             |
| miR-450b-3p         | miRNA           |             |           | 1.35    |             |
| miR-466a-3p         | miRNA           |             |           | 1.35    |             |
| miR-669e            | miRNA           |             |           | 1.35    |             |
| miR-467c            | miRNA           |             |           | 1.33    |             |
| miR-465a-3p         | miRNA           |             | 1.20      | 1.32    |             |
| miR-382             | miRNA           |             | 1.32      | 1.30    |             |
| miR-466b3-3p        | miRNA           |             |           | 1.28    |             |
| miR-582             | stem-loop       | 0.84        | 1.14      | 1.27    |             |
| miR-124             | miRNA           |             |           | 1.27    |             |
| miR-23a             | stem-loop       |             |           | 1.27    |             |
| miR-146a            | stem-loop       |             | 1.21      | 1.23    |             |
| let7d               | miRNA           | 0.78        |           | 1.23    |             |
| miR-1274a           | stem-loop       | 0.86        |           | 1.22    |             |
| miR-29b2            | stem-loop       | 0.83        |           | 1.22    |             |
| miR-467d            | miRNA           |             | 1.16      | 1.20    |             |
| miR-125b1           | stem-loop       |             |           | 1.19    |             |
| let7i               | stem-loop       |             |           | 1.18    |             |
| miR-183-star        | miRNA           |             |           | 1.18    |             |
| miR-34a             | stem-loop       | 0.84        |           | 1.16    |             |
| miR-27a             | stem-loop       |             |           | 1.15    |             |
| miR-27b             | stem-loop       |             |           | 1.14    |             |

| Table 6 (continued) |                 | Fold Change |           |         |             |
|---------------------|-----------------|-------------|-----------|---------|-------------|
| Transcript Name     | Transcript Type | Fold Change |           |         |             |
|                     |                 | B6R/B6D2R   | B6W/B6D2W | B6W/B6R | B6D2W/B6D2R |
| miR-710             | stem-loop       |             |           | 1.12    |             |
| miR-3470b           | stem-loop       | 0.81        |           | 1.11    |             |
| miR-219             | miRNA           |             |           | 0.90    |             |
| miR-30d             | miRNA           |             |           | 0.85    |             |
| miR-22              | miRNA           | 1.32        |           | 0.79    |             |
| miR-22              | stem-loop       |             |           | 0.79    |             |
| miR-299-star        | miRNA           |             |           | 0.79    |             |
| miR-488-star        | miRNA           | 1.33        |           | 0.75    |             |
| v11_miR-197         | miRNA           | 1.44        |           | 0.73    |             |
| miR-2146            | miRNA           |             | 0.67      | 0.71    |             |
| miR-2861            | miRNA           |             |           | 0.66    |             |
| miR-1939            | miRNA           |             |           | 0.65    |             |
| miR-714             | miRNA           |             |           | 0.63    |             |
| miR-762             | miRNA           |             |           | 0.58    |             |
| miR-1944            | miRNA           |             |           | 0.46    |             |
| miR-20b             | miRNA           |             | 2.07      |         |             |
| miR-140             | miRNA           |             | 2.02      |         |             |
| miR-125b-star       | miRNA           |             | 1.80      |         |             |
| miR-30e             | miRNA           |             | 1.75      |         |             |
| miR-106b            | miRNA           | 1.45        | 1.72      |         |             |
| miR-135a-star       | miRNA           |             | 1.56      |         |             |
| miR-503-star        | miRNA           |             | 1.34      |         |             |
| miR-16              | miRNA           |             | 1.30      |         |             |
| miR-27a             | miRNA           |             | 1.25      |         |             |
| miR-669l            | stem-loop       |             | 1.16      |         |             |
| miR-879             | miRNA           |             | 1.13      |         |             |
| miR-466d            | stem-loop       | 1.18        | 1.11      |         |             |
| miR-299             | stem-loop       | 0.87        | 0.91      |         |             |
| miR-692             | miRNA           |             | 0.86      |         |             |
| miR-485             | stem-loop       |             | 0.86      |         |             |
| miR-345             | stem-loop       |             | 0.86      |         |             |
| miR-874             | stem-loop       |             | 0.85      |         |             |
| miR-6803            | stem-loop       |             | 0.83      |         |             |
| miR-466c            | stem-loop       |             | 0.82      |         |             |
| miR-669h            | stem-loop       |             | 0.79      |         |             |
| miR-101a            | stem-loop       |             | 0.77      |         |             |
| miR-1946a           | miRNA           |             | 0.73      |         |             |
| miR-320             | stem-loop       |             | 0.69      |         |             |
| miR-465c1           | stem-loop       |             | 0.41      |         |             |
| miR-1839-3p         | miRNA           | 3.56        |           |         |             |
| miR-2183            | miRNA           | 1.70        |           |         |             |
| miR-93              | stem-loop       | 1.36        |           |         |             |
| miR-489             | miRNA           | 1.19        |           |         |             |
| miR-669j            | miRNA           | 1.14        |           |         |             |
| miR-26a1            | stem-loop       | 1.12        |           |         |             |
| miR-669h            | stem-loop       | 1.10        |           |         |             |
| miR-466b3           | stem-loop       | 0.93        |           |         |             |
| miR-325             | stem-loop       | 0.92        |           |         |             |

| Table 6 (continued) |                 | Fold Change |           |         |             |
|---------------------|-----------------|-------------|-----------|---------|-------------|
| Transcript Name     | Transcript Type | Fold Change |           |         |             |
|                     |                 | B6R/B6D2R   | B6W/B6D2W | B6W/B6R | B6D2W/B6D2R |
| miR-469             | stem-loop       | 0.89        |           |         |             |
| miR-326             | stem-loop       | 0.89        |           |         |             |
| miR-669f            | stem-loop       | 0.86        |           |         |             |
| miR-449b            | miRNA           | 0.84        |           |         |             |
| miR-712-star        | miRNA           | 0.84        |           |         |             |
| miR-330             | stem-loop       | 0.81        |           |         |             |
| miR-151-5p          | miRNA           | 0.80        |           |         |             |
| miR-297a6           | stem-loop       | 0.78        |           |         |             |
| miR-1898            | miRNA           | 0.78        |           |         |             |
| let7b               | miRNA           | 0.77        |           |         |             |
| miR-361             | miRNA           | 0.74        |           |         |             |
| miR-468             | miRNA           | 0.70        |           |         |             |
| miR-1941-5p         | miRNA           | 0.68        |           |         |             |
| miR-1964            | miRNA           | 0.59        |           |         |             |
| miR-466f1           | stem-loop       | 0.56        |           |         |             |
| miR-532-3p          | miRNA           | 0.55        |           |         |             |
| miR-671-3p          | miRNA           | 0.53        |           |         |             |
| miR-98              | miRNA           | 0.47        |           |         |             |

B6 = high-affinity AHR mouse strain.

B6.D2 = low-affinity AHR mouse strain.

W = Western diet; R = Regular diet.

n = 4 mice per experimental group.

**Table S7.** Differentially Expressed miRNA Genes ( $\geq \pm 2.0$  fold) from Liver of B6 vs. B6.D2 Male Mice Fed Regular or High-Fat (Western) Chow for 27 Weeks Beginning at 5 Weeks of Age ( $p$ -value  $\leq 0.05$ ).

| Mouse miRNA Transcript | Transcript Form | Experimental Comparison / |             |           |               | Relevance to AHR and Obesity          | References |
|------------------------|-----------------|---------------------------|-------------|-----------|---------------|---------------------------------------|------------|
|                        |                 | B6R / B6D2R               | B6W / B6D2W | B6W / B6R | B6D2W / B6D2R |                                       |            |
| miR-20b                | miRNA           |                           | 2.07        |           |               | Resveratrol, AHR ligand               | [1]        |
| miR-140                | miRNA           |                           | 2.02        |           |               | described in this paper               |            |
| miR-2133               | miRNA           |                           | 0.48        |           | 1.89          | described in this paper               |            |
| miR-465c1              | stem-loop       |                           | 0.41        |           |               | described in this paper               |            |
| miR-1839-3p            | miRNA           | 3.56                      |             |           |               | described in this paper               |            |
| miR-690                | miRNA           | 2.08                      |             |           | 1.85          | described in this paper               |            |
| miR-98                 | miRNA           | 0.47                      |             |           |               | described in this paper               |            |
| miR-212                | miRNA           | 0.52                      |             | 5.00      | 2.78          | Insulin resistance                    | [2]        |
| miR-205                | miRNA           |                           |             | 4.55      | 5.26          | described in this paper               |            |
| miR-132                | miRNA           | 0.72                      |             | 4.17      | 2.56          | Obesity, NAFLD, Nutritional stress    | [3-5]      |
| miR-155                | miRNA           |                           |             | 4.00      | 2.94          | Hepatocarcinogenesis                  | [6]        |
| miR-146b               | miRNA           |                           |             | 3.85      |               | described in this paper               |            |
| miR-200b               | miRNA           |                           |             | 3.70      | 3.03          | NAFLD                                 | [7]        |
| miR-342-5p             | miRNA           |                           |             | 3.57      | 2.38          | described in this paper               |            |
| miR-34a                | miRNA           |                           |             | 3.23      | 2.44          | NAFLD                                 | [7]        |
| miR-429                | miRNA           |                           |             | 3.23      | 3.45          | described in this paper               |            |
| miR-342-3p             | miRNA           |                           |             | 3.03      | 2.27          | described in this paper               |            |
| miR-1224               | miRNA           |                           |             | 2.94      | 4.17          | described in this paper               |            |
| miR-130b               | miRNA           |                           |             | 2.50      | 1.89          | Adipogenesis, PPAR $\gamma$           | [8]        |
| miR-214*               | miRNA           |                           |             | 2.50      |               | described in this paper               |            |
| miR-223                | miRNA           |                           |             | 2.50      | 1.39          | Leptin, muscle mass                   | [9]        |
| miR-200b*              | miRNA           |                           |             | 2.38      | 2.78          | described in this paper               |            |
| miR-542-5p             | miRNA           | 0.57                      |             | 2.22      | 1.59          | described in this paper               |            |
| miR-199b*              | miRNA           |                           |             | 2.17      |               | described in this paper               |            |
| miR-149                | miRNA           |                           |             | 2.04      | 2.13          | described in this paper               |            |
| miR-181b               | miRNA           |                           |             | 2.04      | 1.67          | described in this paper               |            |
| miR-301a               | miRNA           |                           |             | 2.00      |               | described in this paper               |            |
| miR-1948               | miRNA           | 0.68                      | 0.78        | 0.31      | 0.27          | described in this paper               |            |
| miR-1274a              | miRNA           |                           |             |           | 4.17          | described in this paper               |            |
| miR-1949               | miRNA           |                           |             |           | 3.85          | described in this paper               |            |
| miR-200a               | miRNA           |                           |             |           | 3.57          | NAFLD                                 | [10]       |
| miR-486                | miRNA           |                           |             |           | 2.44          | described in this paper               |            |
| miR-214                | miRNA           |                           |             |           | 2.38          | described in this paper               |            |
| miR-181d               | miRNA           |                           |             |           | 2.27          | Intracellular lipid droplet formation | [11]       |
| miR-181c               | miRNA           |                           |             | 1.56      | 2.13          | described in this paper               |            |
| miR-148a               | miRNA           |                           |             |           | 0.48          | Liver injury                          | [12]       |
| miR-193                | miRNA           |                           |             |           | 0.48          | described in this paper               |            |
| miR-127                | miRNA           |                           |             |           | 0.44          | described in this paper               |            |
| miR-29c                | miRNA           |                           | 1.40        |           | 0.55          | NAFLD                                 | [7]        |
| miR-30c2               | stem-loop       |                           |             |           | 0.81          | Adipogenesis                          | [13]       |
| miR-30a                | miRNA           |                           | 1.36        | 0.72      | 0.64          | Adipogenesis                          | [13]       |
| miR-30d                | miRNA           |                           |             | 0.85      |               | Adipogenesis                          | [13]       |
| miR-30e                | miRNA           |                           | 1.75        |           |               | Adipogenesis                          | [13]       |

B6 = high-affinity AHR mouse strain.

B6.D2 = low-affinity AHR mouse strain.

W = Western diet; R = Regular diet.

NAFLD, non-alcoholic fatty liver disease

n = 4 mice per experimental group.

## References

- Dhar S, Hicks C, & Levenson AS (2011) Resveratrol and prostate cancer: Promising role for microRNAs. *Mol. Nutr. Food Res.* 55(8):1219-1229.
- Pulakat L, Aroor A, Gul R, & Sowers J (2012) Cardiac Insulin Resistance and MicroRNA Modulators. *Experimental Diabetes Research* 2012.
- Heneghan HM, et al. (2011) Differential miRNA Expression in Oriental Adipose Tissue and in the Circulation of Obese Patients Identifies Novel Metabolic Biomarkers. *J Clinical Endocrin. Metab.* 96(5):E846-E8.
- Estep M, et al. (2010) Differential expression of miRNAs in the visceral adipose tissue of patients with non-alcoholic fatty liver disease. *Alimentary Pharmacology & Therapeutics* 32(3):487-497.
- Strum JC, et al. (2009) MicroRNA 132 Regulates Nutritional Stress-Induced Chemokine Production through Repression of SirT1. *Molecular Endocrinology* 23(11):1876-1884.
- Wang B, et al. (2009) Role of microRNA-155 at early stages of hepatocarcinogenesis induced by choline-deficient and amino acid-defined diet in C57BL/6 mice. *Hepatology* 50(4):1152-1161.
- Pogribny IP, et al. (2010) Hepatic miRNAs miR-29c, miR-34a, miR-155, and miR-200b is associated with strain-specific susceptibility to dietary nonalcoholic steatohepatitis in mice. *Lab Invest.* 90:1437.
- Lee EK, et al. (2011) miR-130 Suppresses Adipogenesis by Inhibiting Peroxisome Proliferator-Activated Receptor ( $\gamma$ ) Expression. *Mol. Cell. Biol.* 31(4):626-638.
- Hamrick MW, et al. (2010) The adipokine leptin increases skeletal muscle mass and significantly alters skeletal muscle miRNA expression profile in aged mice. *BBRC* 400(3):379-383.
- Alisi A, et al. (2011) Mirnome analysis reveals novel molecular determinants in the pathogenesis of diet-induced nonalcoholic fatty liver disease. *Lab Invest.* 91(2):283-293.
- Whittaker R, et al. (2010) Identification of MicroRNAs That Control Lipid Droplet Formation and Growth in Hepatocytes via High-Content Screening. *Journal of Biomolecular Screening* 15(7):798-805.
- Farid WRR, et al. (2011) Hepatocyte-derived micromas as serum biomarker of hepatic injury and rejection after liver transplantation. *Liver Transpl.* 18(3):290-297
- Zaragosi L-E, et al. (2011) Small RNA sequencing reveals miR-642a-3p as a novel adipocyte-specific microRNA and miR-30 as a key regulator of human adipogenesis. *Genome Biology* 12(7):R64.
